# Supplementary material
Source: PubMed Central journal article supplement (PMC1584266)

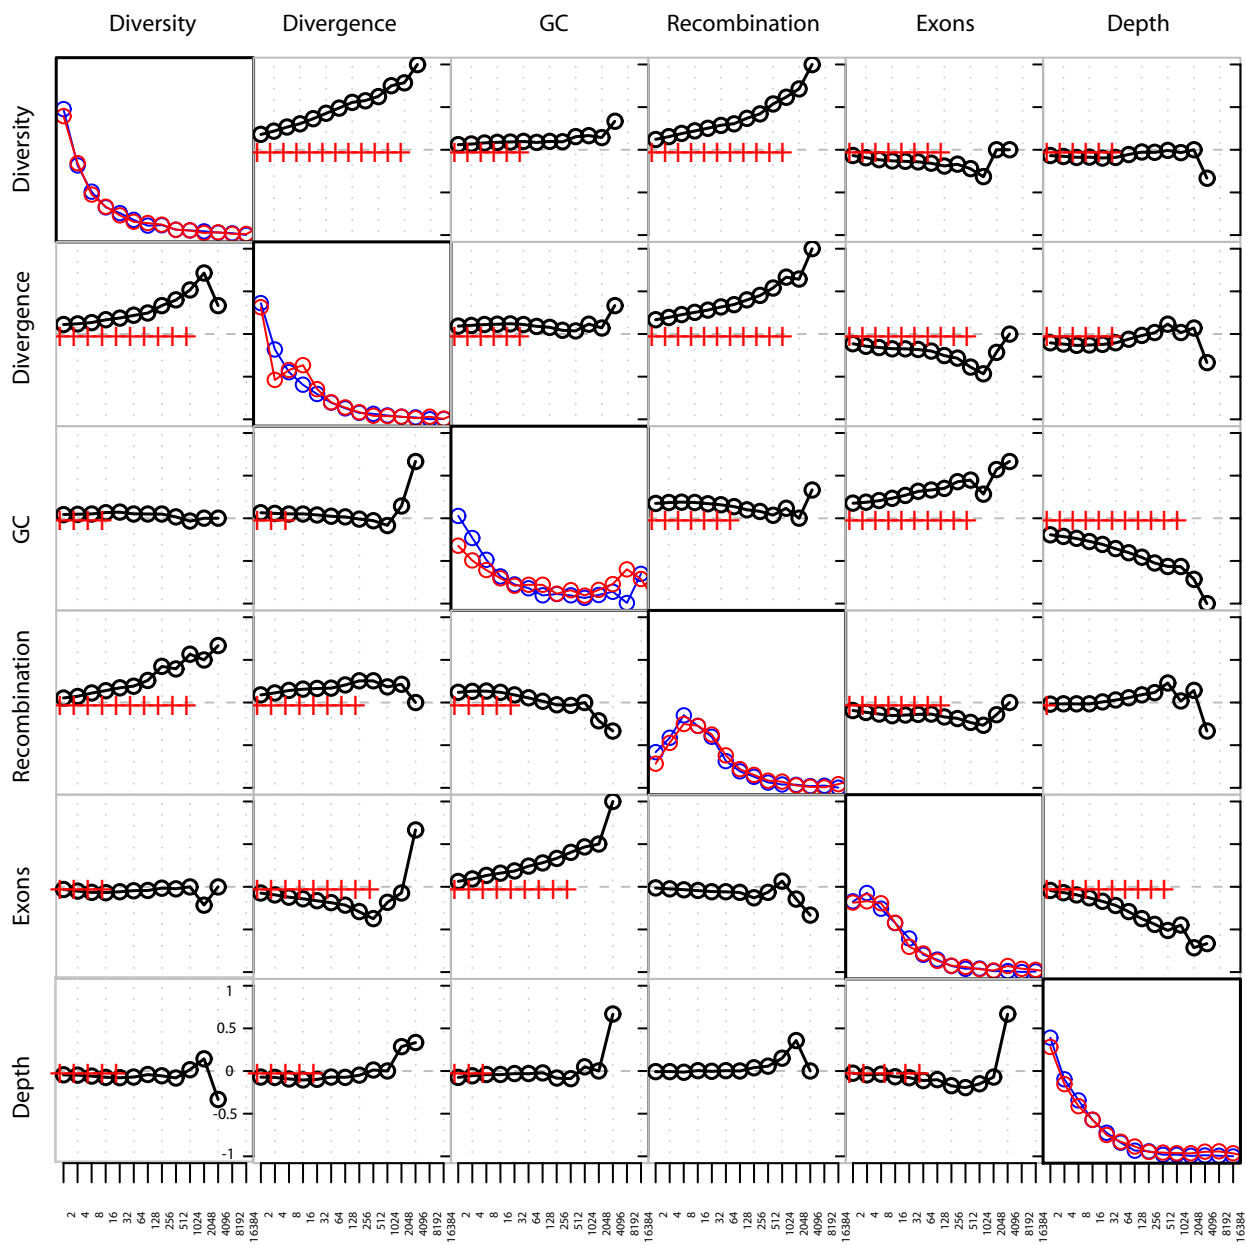

Scale (kb)

Supplement: pgen.0020148.sg001.pdf [file pgen.0020148.sg001.pdf]

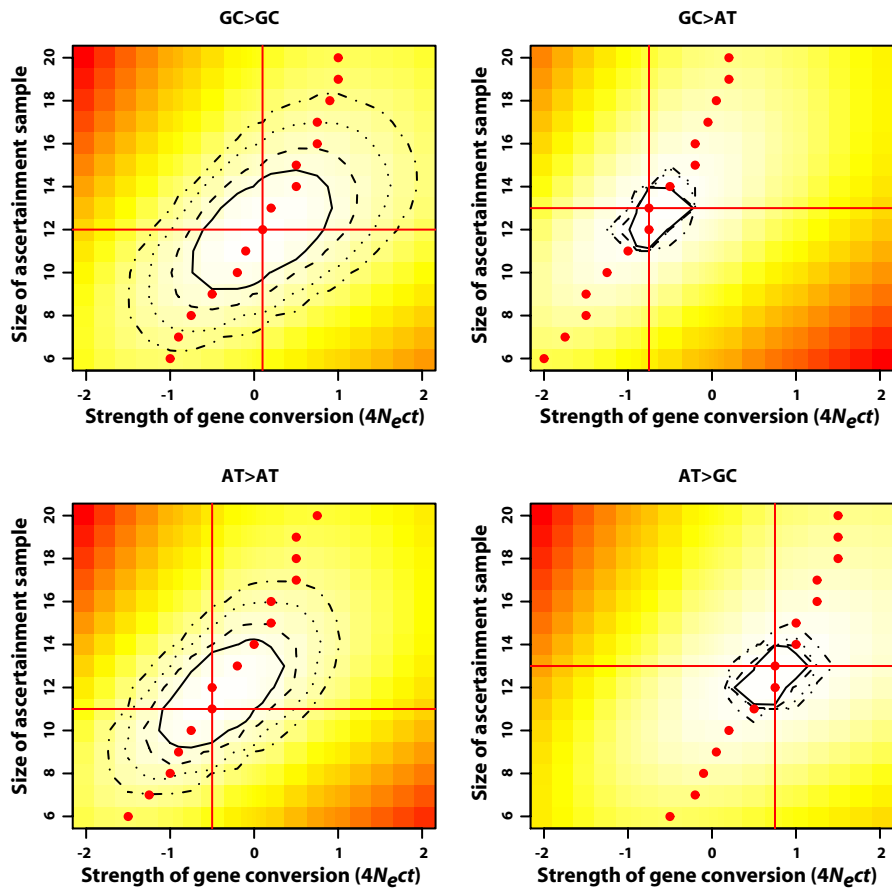

Supplement: pgen.0020148.sg002.pdf [file pgen.0020148.sg002.pdf]

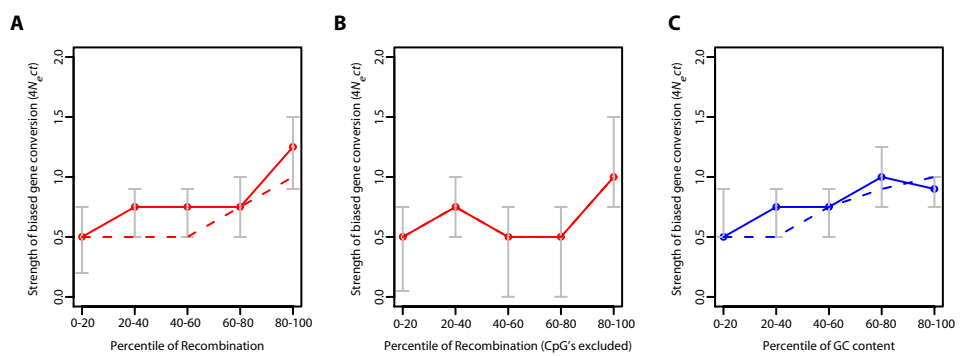

Supplement: pgen.0020148.sg003.pdf [file pgen.0020148.sg003.pdf]
